# Supplementary material for: Predicting the enthalpy of formation of energetic molecules via conventional machine learning and GNN
Source: Royal Society of Chemistry journal article supplement (doi:10.1039/d3cp05490j), 2024-01-01
Supplement: d3cp05490j1.pdf [file d3cp05490j1.pdf]

## Supporting information (SI)

### **Predicting the Enthalpy of Formation of Energetic Molecules via Conventional Machine Learning and GNN**

Di Zhang<sup>a</sup>, Qingzhao Chu<sup>a</sup>, Dongping Chen<sup>a,\*</sup>

<sup>a</sup> State Key Laboratory of Explosion Science and Safety Protection, Beijing Institute of Technology, Beijing, 100081, China.

\* Corresponding author: dc516@bit.edu.cn

---

In the supplementary material, we present:

Table S1 Prior knowledge-based descriptors in CDS descriptors.

Table S2 E-state fingerprint spectrum.

Table S3 Atom and edge attributes for constructing the molecule graph.

Table S4-S11 The performance of different models with different hyperparameters.

Table S12 Top 10 features and meanings for the CDS-RF model using the SHAP tool.

Table S13 Performance of different work on the QM9 data set.

Figure S1 (a) Training curve, (b) error distribution, and (c) parity plot for CDS-MLP model.

Figure S2 (a) Training curve, (b) error distribution, and (c) parity plot for ECFP-MLP model.

Figure S3 (a) Training curve, (b) error distribution, and (c) parity plot for SOAP-MLP model.

Figure S4 (a) Error distribution, and (b) parity plot for CDS-RF model.

Figure S5 (a) Error distribution, and (b) parity plot for ECFP-RF model.

Figure S6 (a) Error distribution, and (b) parity plot for SOAP-RF model.

Figure S7 EOF correlation on (a) oxygen (nO) and (b) nHbondA count in whole data set.

Figure S8 Top 10 features for the CDS-RF model using the SHAP tool.

Figure S9 Top 10 features on QM9-120k dataset.

Figure S10 (a) Training curve, (b) error distribution, and (c) parity plot for GCN model.

Figure S11 (a) Training curve, (c) error distribution, and (c) parity plot for MPNN model.

**Table S1** Prior knowledge-based descriptors in CDS.

| Abbreviation | Description                      | Abbreviation     | Description                           |
|--------------|----------------------------------|------------------|---------------------------------------|
| nHbondA      | Number of hydrogen bond acceptor | nH               | Number of hydrogen atom               |
| nHbondD      | Number of hydrogen bond donor    | nC               | Number of carbon atom                 |
| nAHC         | Number of aromatic heterocycle   | nN               | Number of nitrogen atom               |
| nACC         | Number of aromatic carbocycle    | nO               | Number of oxygen atom                 |
| nHC          | Number of heterocycle            | ob               | Oxygen balance                        |
| nR           | Number of ring                   | Molecular weight | Molecular weight                      |
| nRbond       | Number of rotatable bond         | MOL volume       | Molecular volume                      |
| nNO2         | Number of nitro group            | MinPartialCharge | Minimum value of partial charge       |
| nNNO2        | Number of nitramine group        | MaxPartialCharge | Maximum value of partial charge       |
| nONO2        | Number of nitric ester group     | TPSA             | Topological polar surface area        |
| nC(NO2)3     | Number of nitroform group        | PMI1             | Principle moments of inertia 1        |
| nC(NO2)2     | Number of dinitro group          | PMI2             | Principle moments of inertia 2        |
| nC(NO2)      | Number of single nitro group     | PMI3             | Principle moments of inertia 3        |
| nCH3         | Number of methyl group           | NPR1             | Normalized principal moments ratios 1 |
| nOCH3        | Number of methoxy group          | NPR2             | Normalized principal moments ratios 2 |
| nNH2         | Number of amino group            | PBF              | Plane of best fit                     |

|              |                             |              |                                                     |
|--------------|-----------------------------|--------------|-----------------------------------------------------|
| total energy | Energy calculated by<br>UFF | Eccentricity | Defined by<br>$\sqrt{PMI3^{**2} - PMI1^{**2}}/PMI3$ |
|--------------|-----------------------------|--------------|-----------------------------------------------------|

**Table S2** E-state fingerprint spectrum.

| Index | Type                                | Index | Type                 | Index           | Type                |
|-------|-------------------------------------|-------|----------------------|-----------------|---------------------|
| 1     | -Li                                 | 28    | =N <sup>-a</sup>     | 55              | -GeH <sub>3</sub>   |
| 2     | -Be-                                | 29    | aNa <sup>a</sup>     | 56              | -GeH <sub>2</sub> - |
| 3     | >Be<[-2]                            | 30    | >N <sup>-a</sup>     | 57              | >GeH-               |
| 4     | -BH-                                | 31    | -N<< <sup>a</sup>    | 58              | >Ge<                |
| 5     | >B-                                 | 32    | aaNs <sup>a</sup>    | 59              | -AsH <sub>2</sub>   |
| 6     | >B<[-1]                             | 33    | >N<[+1] <sup>a</sup> | 60              | -ASH-               |
| 7     | -CH <sub>3</sub> <sup>a</sup>       | 34    | -OH <sup>a</sup>     | 61              | >AS-                |
| 8     | =CH <sub>2</sub> <sup>a</sup>       | 35    | =O <sup>a</sup>      | 62              | ->As=               |
| 9     | -CH <sub>2</sub> <sup>-a</sup>      | 36    | -O <sup>-a</sup>     | 63              | ->As<               |
| 10    | ≡CH <sup>a</sup>                    | 37    | aOa <sup>a</sup>     | 64              | -she                |
| 11    | =CH <sup>-a</sup>                   | 38    | -F <sup>-a</sup>     | 65              | =Se                 |
| 12    | aCHa <sup>a</sup>                   | 39    | -SiH <sub>3</sub>    | 66              | -Se-                |
| 13    | >CH <sup>-a</sup>                   | 40    | -SiH <sub>2</sub> -  | 67              | aSea                |
| 14    | =C= <sup>a</sup>                    | 41    | >SiH-                | 68              | >Se=                |
| 15    | ≡C <sup>-a</sup>                    | 42    | >Si<                 | 69              | ≥Se=                |
| 16    | =C< <sup>a</sup>                    | 43    | -PH <sub>2</sub>     | 70 <sup>a</sup> | -Br                 |
| 17    | aCa <sup>-a</sup>                   | 44    | -PH-                 | 71              | -SnH <sub>3</sub>   |
| 18    | aaCa <sup>a</sup>                   | 45    | >P-                  | 72              | -SnH <sub>2</sub> - |
| 19    | >C< <sup>a</sup>                    | 46    | ->P=                 | 73              | >SnH-               |
| 20    | -NH <sub>3</sub> [+1] <sup>a</sup>  | 47    | ->P<                 | 74              | >Sn<                |
| 21    | =N <sup>-a</sup>                    | 48    | -SH                  | 75 <sup>a</sup> | -I                  |
| 22    | -NH <sub>2</sub> -[+1] <sup>a</sup> | 49    | =S                   | 76              | -PbH <sub>3</sub>   |
| 23    | =NH <sup>-a</sup>                   | 50    | -S                   | 77              | -PbH <sub>2</sub> - |
| 24    | -NH <sup>-a</sup>                   | 51    | aSa                  | 78              | >PbH-               |
| 25    | aNHa <sup>a</sup>                   | 52    | >S=                  | 79              | >Pb<                |
| 26    | ≡N <sup>a</sup>                     | 53    | ≥S≤                  |                 |                     |
| 27    | >NH-[+1] <sup>a</sup>               | 54    | -Cl <sup>a</sup>     |                 |                     |

<sup>a</sup>These fingerprints are selected in this study.

**Table S3** Atom and edge attributes for constructing the molecule graph.

| Graph-level | Feature       | Description                           | Size |
|-------------|---------------|---------------------------------------|------|
|             | atom type     | Type of atom(ex.C,N,O)                | 9    |
| Atom        | degree        | Number of neighbors<br>(ex.0,1,2,3,4) | 9    |
|             | formal charge | Integer electronic charge assigned    | 8    |

|      |                    |                                                                                          |   |
|------|--------------------|------------------------------------------------------------------------------------------|---|
|      |                    | to atom<br>(ex.-3, -2, -1, 0, 1, 2, 3)                                                   |   |
|      | hybridization type | <i>s, sp, sp<sup>2</sup>, sp<sup>3</sup></i>                                             | 7 |
|      | is_in_a_ring       | Whether the atom is in a ring                                                            | 1 |
|      | aromaticity        | Whether the atom is part of an aromatic system                                           | 1 |
|      | atomic mass        | Mass of atom, scaled                                                                     | 1 |
|      | vdw_radius         | van der Waals Radius, scaled                                                             | 1 |
|      | covalent_radius    | covalent radius, scaled                                                                  | 1 |
|      | chirality_type     | Chirality of atom<br>(ex.CHI_UNSPECIFIED,<br>CHI_TETRAHEDRAL_CW,<br>CHI_TETRAHEDRAL_CCW) | 4 |
|      | n_hydrogens        | Number of bonded hydrogens<br>0, 1, 2, 3, 4                                              | 6 |
|      | bond type          | Single, double, triple, aromatic                                                         | 4 |
| Bond | conjugated         | Whether the bond is conjugated                                                           | 1 |
|      | in ring            | Whether the bond is part of ring                                                         | 1 |
|      | stereo type        | None,any,Z/E                                                                             | 4 |

**Table S4** The performance of CDS-RF model with different hyperparameters.

| Parameters |              | Performance |        |        |
|------------|--------------|-------------|--------|--------|
|            | n estimators | $R^2$       | MAE    | RMSE   |
| 1          | 200          | 0.970       | 11.605 | 16.231 |
| 2          | 150          | 0.970       | 11.606 | 16.229 |
| 3          | 100          | 0.970       | 11.637 | 16.295 |

**Table S5** The performance of ECFP-RF model with different hyperparameters.

| Parameters |              | Performance |        |        |
|------------|--------------|-------------|--------|--------|
|            | n estimators | $R^2$       | MAE    | RMSE   |
| 1          | 200          | 0.899       | 19.532 | 30.562 |
| 2          | 150          | 0.898       | 19.569 | 30.628 |
| 3          | 100          | 0.897       | 19.671 | 30.838 |

**Table S6** The performance of SOAP-RF model with different hyperparameters.

| Parameters |  | Performance |  |  |
|------------|--|-------------|--|--|
|------------|--|-------------|--|--|

|   | n estimators | $R^2$ | MAE    | RMSE   |
|---|--------------|-------|--------|--------|
| 1 | 200          | 0.968 | 12.268 | 17.222 |
| 2 | 150          | 0.968 | 12.294 | 17.270 |
| 3 | 100          | 0.968 | 12.319 | 17.280 |

**Table S7** The performance of CDS-MLP model with different hyperparameters.

| Parameters |                    |               | Performance |       |        |
|------------|--------------------|---------------|-------------|-------|--------|
|            | hidden layer sizes | learning rate | $R^2$       | MAE   | RMSE   |
| 1          | 256,128            | 0.001         | 0.986       | 7.750 | 11.073 |
| 2          | 256,256            | 0.001         | 0.986       | 8.034 | 11.379 |
| 3          | 128,128            | 0.001         | 0.986       | 8.105 | 11.495 |
| 4          | 256,128            | 0.01          | 0.984       | 8.721 | 12.153 |
| 5          | 256,256            | 0.01          | 0.983       | 8.825 | 12.508 |
| 6          | 128,128            | 0.01          | 0.983       | 8.603 | 12.384 |

**Table S8** The performance of ECFP-MLP model with different hyperparameters.

| Parameters |                    |               | Performance |        |        |
|------------|--------------------|---------------|-------------|--------|--------|
|            | hidden layer sizes | learning rate | $R^2$       | MAE    | RMSE   |
| 1          | 256,128            | 0.001         | 0.933       | 17.946 | 24.991 |
| 2          | 256,256            | 0.001         | 0.933       | 18.052 | 25.038 |
| 3          | 128,128            | 0.001         | 0.926       | 19.111 | 26.247 |
| 4          | 256,128            | 0.01          | 0.931       | 18.195 | 25.429 |
| 5          | 256,256            | 0.01          | 0.927       | 18.835 | 26.057 |
| 6          | 128,128            | 0.01          | 0.924       | 19.240 | 26.678 |

**Table S9** The performance of SOAP-MLP model with different hyperparameters.

| Parameters |                    |               | Performance |       |        |
|------------|--------------------|---------------|-------------|-------|--------|
|            | hidden layer sizes | learning rate | $R^2$       | MAE   | RMSE   |
| 1          | 256,128            | 0.001         | 0.984       | 8.124 | 12.061 |
| 2          | 256,256            | 0.001         | 0.984       | 8.270 | 12.075 |
| 3          | 128,128            | 0.001         | 0.984       | 8.552 | 12.137 |
| 4          | 256,128            | 0.01          | 0.986       | 8.000 | 11.632 |
| 5          | 256,256            | 0.01          | 0.986       | 7.997 | 11.456 |
| 6          | 128,128            | 0.01          | 0.986       | 7.951 | 11.323 |

**Table S10** The performance of GCN model with different hyperparameters.

|   | Parameters         |               | Performance |       |        |
|---|--------------------|---------------|-------------|-------|--------|
|   | hidden layer sizes | learning rate | $R^2$       | MAE   | RMSE   |
| 1 | 256,256            | 0.001         | 0.983       | 8.912 | 12.759 |
| 2 | 512,512            | 0.001         | 0.987       | 7.597 | 11.051 |
| 3 | 128,128            | 0.001         | 0.980       | 9.794 | 13.707 |
| 4 | 256,256            | 0.01          | 0.986       | 8.088 | 11.372 |
| 5 | 512,512            | 0.01          | 0.986       | 8.067 | 11.611 |
| 6 | 128,128            | 0.01          | 0.986       | 7.933 | 11.352 |
| 7 | 256,256,256        | 0.001         | 0.989       | 7.014 | 10.333 |
| 8 | 512,512,512        | 0.001         | 0.990       | 6.537 | 9.6493 |

**Table S11** The performance of MPNN model with different hyperparameters.

|   | Parameters         |               | Performance |       |        |
|---|--------------------|---------------|-------------|-------|--------|
|   | hidden layer sizes | learning rate | $R^2$       | MAE   | RMSE   |
| 1 | 256,256            | 0.001         | 0.989       | 6.773 | 9.911  |
| 2 | 512,512            | 0.001         | 0.990       | 6.504 | 9.595  |
| 3 | 128,128            | 0.001         | 0.989       | 6.874 | 10.079 |
| 4 | 256,256            | 0.01          | 0.990       | 6.420 | 9.377  |
| 5 | 512,512            | 0.01          | 0.990       | 6.426 | 9.474  |
| 6 | 128,128            | 0.01          | 0.989       | 6.725 | 10.000 |
| 7 | 256,256,256        | 0.001         | 0.992       | 5.379 | 8.450  |
| 8 | 512,512,512        | 0.001         | 0.992       | 5.243 | 8.419  |

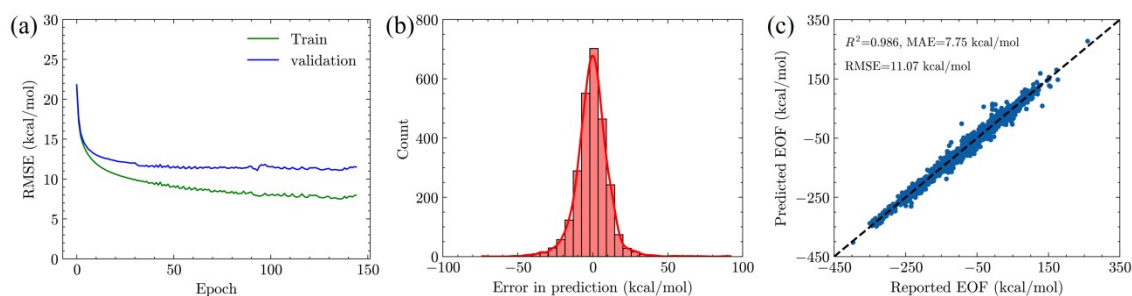**Figure S1** (a) Training curve, (b) error distribution, and (c) parity plot for CDS-MLP model.

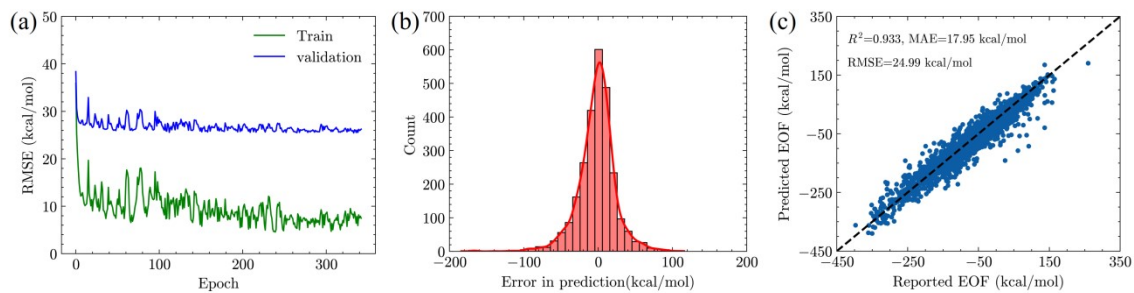

**Figure S2** (a) Training curve, (b) error distribution, and (c) parity plot for ECFP-MLP model.

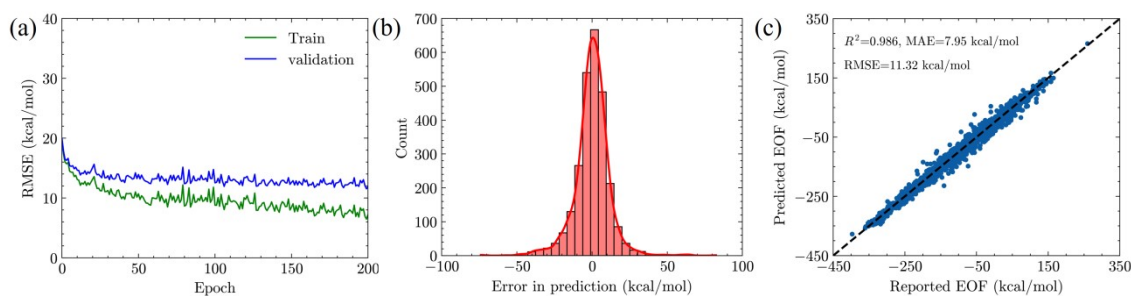

**Figure S3** (a) Training curve, (b) error distribution, and (c) parity plot for SOAP-MLP model.

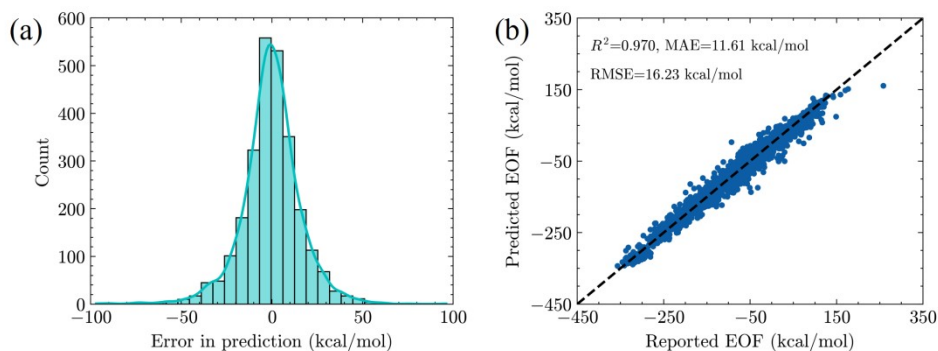

**Figure S4** (a) Error distribution, and (b) parity plot for CDS-RF model.

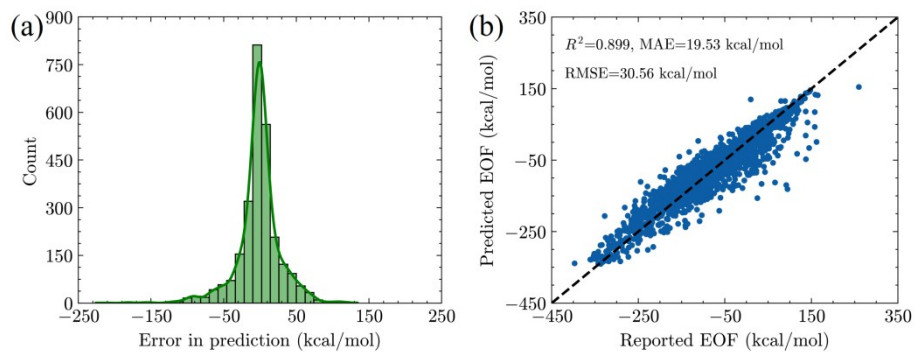

**Figure S5** (a) Error distribution, and (b) parity plot for ECFP-RF model.

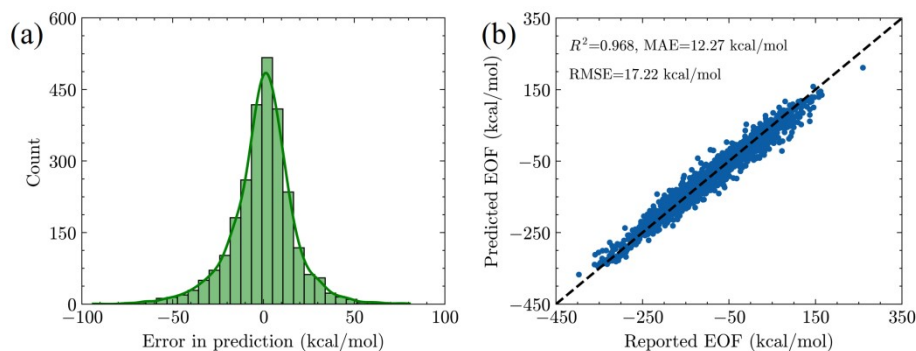

**Figure S6** (a) Error distribution, and (b) parity plot for SOAP-RF model.

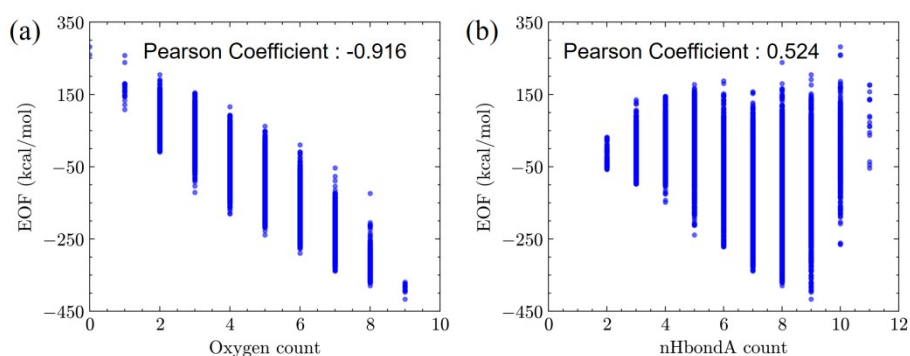

**Figure S7** EOF correlation on (a) oxygen (nO) and (b) nHbondA count in whole data set.

To further understand the significant impact of nO on the EOF, we verify it from the following two aspects.

Firstly, to eliminate the influence of the ranking tool on the results, we use the SHAP (SHapley Additive exPlanations) tool to sort the importance of each feature in the CDS-RF model. The impact of each feature on the EOF is shown in Figures S8. The meaning of the first 10 features is shown in Table S12. Although the principles of feature sorting in SHAP and this study are different, nO still has the greatest impact on the model, which supports the reliability of the results from another perspective.

Secondly, it is generally believed that nN and nC should have a greater impact. However, nN and nC have a smaller influence in our results. We speculate that this is due to the uniqueness of the current data set. To support our hypothesis, we conduct an auxiliary verification using a publicly available QM9 dataset<sup>1</sup>, consisting of 134 k organic small molecules containing CHONF, encompassing geometric, energetic, electronic, and thermodynamic properties. After excluding molecules that cannot be processed and species containing the element F, we train our RF model



using the same CDS descriptors on the remaining 120,056 molecules. We then perform feature importance ranking and obtain the results shown in Figure S9. The most influential factors are molecule weight, oxygen balance, nO, nC, nH, and nN, where the top two factors are closely related to the quantities of C, O, and N. Additionally, nC and nN exhibit high ranking. The results from the QM9 dataset demonstrate substantial differences in feature importance ranking obtained from different datasets. Therefore, we believe that the significant impact of nO is attributed to the uniqueness of the data set in our study.

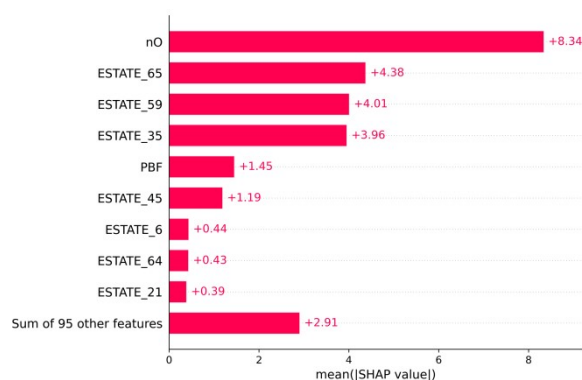

**Figure S8** Top 10 features for the CDS-RF model using the SHAP tool.

**Table S12** Top 10 features and meanings for the CDS-RF model using the SHAP tool.

| Features  | Meaning                                                   |
|-----------|-----------------------------------------------------------|
| nO        | The number of O                                           |
| ESTATE_65 | The sum of the electrical topological state index of aO   |
| ESTATE_59 | The sum of the electrical topological state index of -N<< |
| ESTATE_35 | The sum of the electrical topological state index of -CH3 |
| PBF       | Plane of best fit                                         |
| ESTATE_45 | The sum of the electrical topological state index of aCa  |
| ESTATE_6  | The number of -CH-                                        |
| ESTATE_64 | The sum of the electrical topological state index of -O-  |
| ESTATE_21 | The number of =N-                                         |

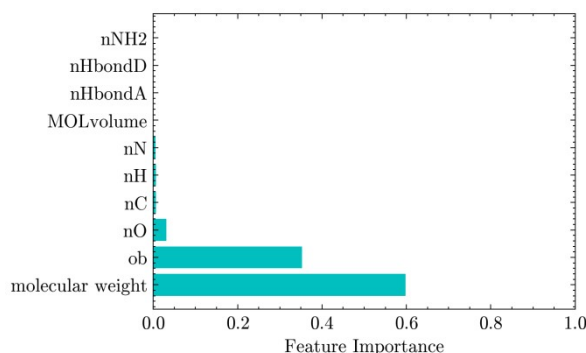

**Figure S9** Top 10 features on QM9-120k dataset.

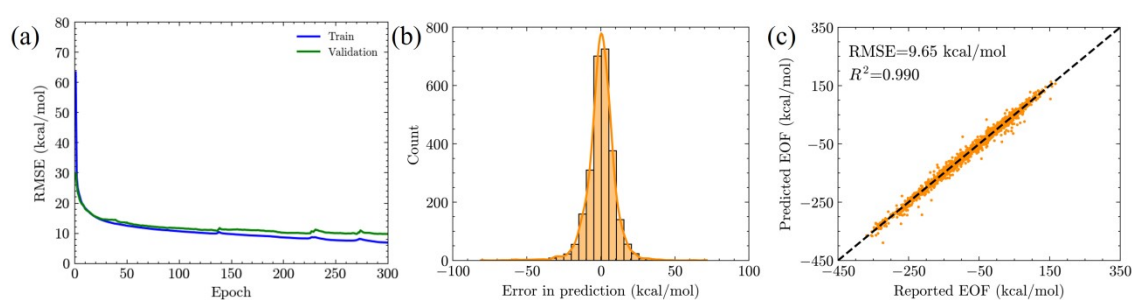

**Figure S10** (a) Training curve, (b) error distribution, and (c) parity plot for GCN model.

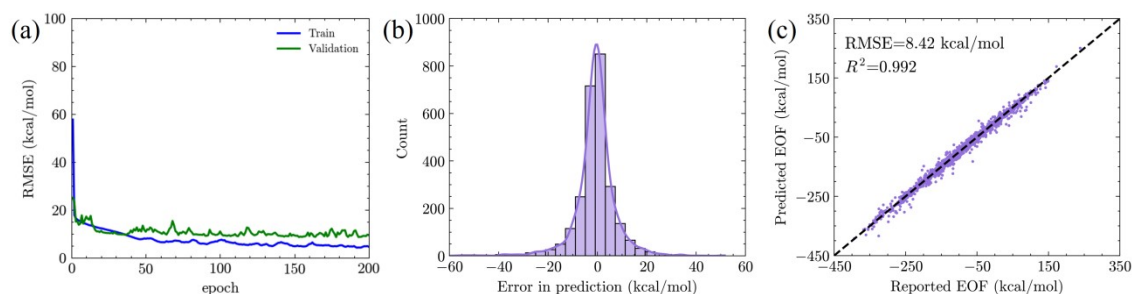

**Figure S11** (a) Training curve, (c) error distribution, and (c) parity plot for MPNN model.

In order to validate the reliability of the MPNN model, we conduct experiments on the publicly available QM9 dataset and compare the performance of our MPNN model with other models on the same QM9 dataset. The QM9 dataset comprises 130,829 molecules containing CHONF with no more than 9 heavy atoms. This dataset exists in two versions, as provided by Faber et al.<sup>2</sup> and Ramakrishnan et al.<sup>1</sup> We conduct tests on the U0 (internal energy at 0 K) from both versions of the QM9 dataset and compare the results with widely used models such as Chemprop<sup>3,4</sup> and Megnet<sup>5</sup>. The results are shown in Table S13.

For the U0 from Faber et al.<sup>2</sup>, our MPNN model yield an MAE of 0.0494 eV, lower than

Gabriel et al.'s<sup>6</sup> results but slightly higher than Megnet<sup>5</sup> and SchNet<sup>7,8</sup>. The MAE in Faber's<sup>2</sup> work ranges from 0.0421 to 1.08 eV, and our error falls within the same range. Overall, our findings are within a reasonable range.

Regarding the U0 from Ramakrishnan et al.<sup>1</sup>, after processing, we obtain a total of 120,056 data points. The RMSE of this dataset is 2.47 Hartree, which is close to the reported RMSE of Chemprop<sup>3,4</sup> as 2.44 Hartree. In summary, the prediction performance obtained from various works on the QM9 dataset are generally consistent with the performance of our MPNN model.

**Table S13** Performance of different work on the QM9 data set.

| Data set                         | Model                      | $R^2$ | MAE             | RMSE         | Number |
|----------------------------------|----------------------------|-------|-----------------|--------------|--------|
| Faber et al. <sup>2</sup>        | Faber <sup>2</sup>         | -     | 0.0421~1.08 eV  | -            | 118k   |
|                                  | Megnet-simple <sup>5</sup> | -     | 0.012 eV        | -            | 118k   |
|                                  | SchNet <sup>7,8</sup>      | -     | 0.014 eV        | -            | 100k   |
|                                  | Gabriel <sup>6</sup>       | -     | 0.0573~0.084 eV | -            | 101k   |
|                                  | This work                  | 0.989 | 0.0494 eV       | 0.1034 eV    | 130k   |
| Ramakrishnan et al. <sup>1</sup> | Chemprop <sup>3,4</sup>    | -     | 1.08 Hartree    | 2.44 Hartree | 130k   |
|                                  | This work                  | 0.996 | 0.91 Hartree    | 2.47 Hartree | 120k   |

## Reference

1. R. Ramakrishnan, P. O. Dral, M. Rupp and O. A. von Lilienfeld, *Sci. Data*, 2014, **1**, 140022.
2. F. A. Faber, L. Hutchison, B. Huang, J. Gilmer, S. S. Schoenholz, G. E. Dahl, O. Vinyals, S. Kearnes, P. F. Riley and O. A. von Lilienfeld, *J. Chem. Theory Comput.*, 2017, **13**, 5255-5264.
3. E. Heid, K. P. Greenman, Y. Chung, S. C. Li, D. E. Graff, F. H. Vermeire, H. Wu, W. H. Green and C. J. McGill, *J. Chem. Inf. Model*, 2023, **64**, 14229-14242.
4. K. Yang, K. Swanson, W. Jin, C. Coley, P. Eiden, H. Gao, A. Guzman-Perez, T. Hopper, B. Kelley, M. Mathea, A. Palmer, V. Settels, T. Jaakkola, K. Jensen and R. Barzilay, *J. Chem. Inf. Model*, 2019, **59**, 3370-3388.
5. C. Chen, W. Ye, Y. Zuo, C. Zheng and S. P. Ong, *Chem. Mater.*, 2019, **31**, 3564-3572.
6. G. A. Pinheiro, J. Mucelini, M. D. Soares, R. C. Prati, J. L. F. Da Silva and M. G. Quiles, *J. Phys. Chem. A*, 2020, **124**, 9854-9866.
7. K. T. Schütt, M. Gastegger, A. Tkatchenko, K. R. Müller and R. J. Maurer, *Nat. Commun.*, 2019, **10**, 5024.
8. K. T. Schütt, H. E. Sauceda, P.-J. Kindermans, A. Tkatchenko and K.-R. Müller, *J. Chem. Phys.*, 2018, **148**, 241722.
